# Supplementary material for: Genetic Profile of Patients with Limb-Girdle Muscle Weakness in the Chilean Population
Source: MDPI journal article supplement (doi:10.3390/genes13061076), 2022-06-16
Supplement: s1 [file s1]

### Supplementary File S1. Genes Included in the Different NGS Panels

[illegible]

**2. DLE-NGS – DLE Laboratory, Sao Paulo, Brazil (Sanofi-Genzyme)** 10 genes panel, 9 most frequent recessive LGMD and Pompe disease, DLE Labs, Sao Paulo, Brazil: CAPN3; DYSF; SGCG; SGCA; SGCB; SGCD; FKRP; ANO5; TCAP, GAA.

**3. CL-NGS**, ICBM locally designed 15 LGMD gene panel: LMNA; CAV3; DNAJB6; CAPN3; DYSF; SGCG; SGCA; SGCB; SGCD; FKRP; ANO5; FKTN; EMD; FHL1; DES.

**4. Invitae™ Comprehensive Neuromuscular Disorders Panel (CNMDP).** 123 gene Comprehensive Neuromuscular Panel, California, USA: ACTA1, AGRN, ALG14, ALG2, ANO5, ATP2A1, B3GALNT2, B4GAT1, BAG3, BIN1, CACNA1S, CAPN3, CAV3, CCDC78, CFL2, CHAT, CHKB, CHRNA1, CHRNA1, CHRNA1, CHRNA1, CHRNA1, CLCN1, CNTN1, COL12A1, COL6A1, COL6A2, COL6A3, COLQ, CPT2, CRYAB, DAG1, DES, DMD, DNAJB6, DNM2, DOK7, DPAGT1, DPM1, DPM2, DPM3, DYSLF, EMD, FHL1, FKBP14, FKRP, FKTN, FLNC, GAA, GFPT1, GMPPB, GNE, HNRNP2B1, HNRNPDL, ISPD, ITGA7, KBTBD13, KCNJ2, KLHL40, KLHL41, LAMA2, LAMB2, LAMP2, LARGE1, LDB3, LIMS2, LMNA, LMOD3, LRP4, MATR3, MEGF10, MTM1, MUSK, MYF6, MYH2, MYH7, MYL2, MYOT, MYPN, NEB, PLEC, PNPLA2, POMGNT1, POMGNT2, POMK, POMT1, POMT2, PREPL, RAPSN, RYR1, SCN4A, SELENON, SGCA, SGCB, SGCD, SGCG, SMCHD1, SMN1, SMN2, SNAP25, SQSTM1, STAC3, STIM1, SUN1, SUN2, SYNE1, SYNE2, TAZ, TCAP, TIA1, TMEM43, TMEM5, TNNT1, TNPO3, TOR1AIP1, TPM2, TPM3, TRAPPC11, TRIM32, TTN, VCP, VMA21.

In patient P53-Myo120, a 137 gene panel was performed. It adds to the 123-gene panel the following genes: ADSSL1, AMPD1, CASQ1, COL13A1, GOSR2, GYG1, GYS1, HACD1, ISCU, MAP3K20, MICU1, MYO18B, ORAI1, PYROXD1, RXYLT1, SLC18A3, SLC5A7, SPEG, SYT2, TK2, VAMP1, and excludes the following genes: LAMB2, LRP4, MYF6, SNAP25, TMEM5
