# Supplementary material for: Genetic Profile of Patients with Limb-Girdle Muscle Weakness in the Chilean Population
Source: MDPI journal article supplement (doi:10.3390/genes13061076), 2022-06-16
Supplement: s1 [file s1]

| Supplementary Table S1. Summary of the clinical and genetic screening of the Chilean series of patients with LGMW |          |                     |                                  |                                                  |                                   |              |                                                                     |                         |                                                  |                     |
|-------------------------------------------------------------------------------------------------------------------|----------|---------------------|----------------------------------|--------------------------------------------------|-----------------------------------|--------------|---------------------------------------------------------------------|-------------------------|--------------------------------------------------|---------------------|
| ID                                                                                                                | Local ID | Suspected Diagnosis | Other diagnostic tests           | Definite Diagnosis                               | Screening Method                  | Affected Gen | Pathogenic or most probably potentially pathogenic variants found   | Genomic Position (hg19) | ACMG codes                                       | ACMG classification |
| P1                                                                                                                | Myo004   | LGMDR1              | Bx, MRI, lab, EcoK, Sp. EMG, SEG | LGMDR1-Calpain 3 related myopathy                | MyoPanel2 <sup>(1)</sup>          | <i>CAPN3</i> | Ex22: NM_000070.3:c.2362_2363delinsTCATCT; p.(Arg788SerfsTer14) HOZ | 15:42703180-42703181    | PVS1, PM3_very_strong, PM2, PP4_mod              | Pathogenic          |
| P2                                                                                                                | Myo004.1 | LGMDR1              | Bx, MRI, lab, EcoK, Sp. EMG, SEG | LGMDR1-Calpain 3 related myopathy                | MyoPanel2                         | <i>CAPN3</i> | Ex22: NM_000070.3:c.2362_2363delinsTCATCT; p.(Arg788SerfsTer14) HOZ | 15:42703180-42703181    | PVS1, PM3_very_strong, PM2, PP4_mod              | Pathogenic          |
| P3                                                                                                                | Myo017   | hiCK, arrhythmia    | Bx, MRI, lab, EcoK, Sp. EMG, SEG | LGMDR12-Anoctamin 5 related myopathy             | MyoPanel2                         | <i>ANO5</i>  | Ex19: NM_213599.3:c.2201T>C; p.(Leu734Pro) HOZ                      | 11:22294501             | PM2, PM3, PP3, PP4_mod                           | Likely pathogenic   |
| P4                                                                                                                | Myo023   | hiCK                | Bx, MRI, lab, EcoK, Sp. EMG      | Congenital Paramyotonia                          | MyoPanel2                         | <i>SCN4A</i> | Ex22: NM_000334.4:c.3938C>T; p.(Thr1313Met) HEZ                     | 17:62021185             | PS3, PS4, PM2, PP3, PP4_mod                      | Pathogenic          |
| P5                                                                                                                | Myo029   | Myalgia, hiCK       | Bx, lab, EMG                     | <i>RYR1</i> -related myopathy?                   | MyoPanel2                         | <i>RYR1</i>  | Ex6: NM_000540.3:c.487C>T; p.(Arg163Cys) HEZ                        | 19:38934851             | PS3, PS4, PM2, PP3, PP4                          | Pathogenic          |
|                                                                                                                   |          |                     |                                  |                                                  |                                   | <i>MYH7</i>  | Ex20: NM_000257.4:c.2167C>T; p.(Arg723Cys) HEZ                      | 14:23895023             | PS4, PP1_Strong, PM1, PM2, PM5, PM6, PP3         | Pathogenic          |
| P6                                                                                                                | Myo031   | LGMW, hiCK,         | Bx, lab, EcoK, Sp. EMG           | Compatible with titinopathy                      | CL-NGS <sup>(2)</sup> ; MyoPanel2 | <i>TTN</i>   | Ex340: NM_001267550.2:c.94507G>A:p.(Ala31503Thr) HEZ                | 2:179411745             | PP3, PP4                                         | VUS                 |
| P7                                                                                                                | Myo042   | Dysferlinop.        | Lab, EcoK, Sp. EMG               | LGMDR2-Dysferlin related myopathy                | DLE-NGS <sup>(3)</sup>            | <i>DYSF</i>  | Ex6: NM_003494.4:c.526C>T; p.(Gln208Ter) HEZ                        | 2:71740914              | PVS1, PM3, PM2, PP4_mod                          | Pathogenic          |
|                                                                                                                   |          |                     |                                  |                                                  |                                   |              | Ex13: NM_003494.4:c.1276G>A; p.(Gly426Arg) HEZ                      | 2:71755523              | PM3_strong, PM2, PP3, PP4_mod                    | Likely pathogenic   |
| P8                                                                                                                | Myo050   | LGMDR1              | Bx, MRI, lab, EcoK, Sp. EMG, SEG | LGMDR1-Calpain 3 related myopathy                | MyoPanel2                         | <i>CAPN3</i> | Ex1: NM_000070.3:c.107delG: p.(Gly36ValfsTer21) HOZ                 | 15:42652105             | PVS1, PM2, PM3, PP4_mod                          | Pathogenic          |
| P9                                                                                                                | Myo052   | LGMDR, hi-CK        | Bx, MRI, lab, EcoK, Sp. EMG      | LGMDR9-FKRP-related myopathy                     | MyoPanel2                         | <i>FKRP</i>  | FKRP: Ex4: NM_024301.5:c.919T>G; p.(Tyr307Asp) HEZ                  | 19:47259626             | PM5, PM3_sup, PM2, PP3, PP4_mod                  | Likely pathogenic   |
|                                                                                                                   |          |                     |                                  |                                                  |                                   |              | FKRP: Ex4: NM_024301.5:c.877A>C; p.(Thr293Pro) HEZ                  | 19:47259584             | PM5, PM3_sup, PM2, PP3, PP4_mod                  | Likely pathogenic   |
| P10                                                                                                               | Myo053   | LGMD-R3-6           | Bx, MRI, lab, EcoK, Sp. EMG, Ab  | IMNM Anti HMGCR-Ab                               | CL-NGS; MyoPanel2                 | <i>None</i>  |                                                                     |                         |                                                  |                     |
| P11                                                                                                               | Myo054   | LGMD-R?             | Bx, MRI, lab, EcoK, Sp. EMG      | Unknown                                          | MyoPanel2                         | <i>None</i>  |                                                                     |                         |                                                  |                     |
| P12                                                                                                               | Myo055   | LGMD-R?             | Bx, MRI, lab, EcoK, Sp. EMG      | Unknown                                          | MyoPanel2                         | <i>None</i>  |                                                                     |                         |                                                  |                     |
| P13                                                                                                               | Myo056   | LGMD-R?             | Bx, MRI, lab, EcoK, Sp. EMG, Ab  | IMNM Anti-SRP Ab. Deceased esophageal hemorrhage | CL-NGS, DLE-NGS                   | <i>None</i>  |                                                                     |                         |                                                  |                     |
| P14                                                                                                               | Myo057   | LGMDR-3-6           | Bx, MRI, lab, EcoK, Sp. EMG, SEG | LGMDR1-Calpain 3 related myopathy                | MyoPanel2                         | <i>CAPN3</i> | Ex1: NM_000070.3:c.107delG p.(Gly36ValfsTer21) HEZ                  | 15:42652105             | PVS1, PM2, PM3, PP4_mod                          | Pathogenic          |
|                                                                                                                   |          |                     |                                  |                                                  |                                   |              | Ex21: NM_000070.3:c.2243G>A; p.(Arg748Gln) HEZ                      | 15:42702844             | PM3_VS, PS3_sup, PM1, PM2, PP3, PP1_mod; PP4_mod | Pathogenic          |

| Supplementary Table S1. Summary of the clinical and genetic screening of the Chilean series of patients with LGMW (Continued) |          |                     |                                  |                                                                       |                                                   |              |                                                                      |                         |                                            |                     |
|-------------------------------------------------------------------------------------------------------------------------------|----------|---------------------|----------------------------------|-----------------------------------------------------------------------|---------------------------------------------------|--------------|----------------------------------------------------------------------|-------------------------|--------------------------------------------|---------------------|
| ID                                                                                                                            | Local ID | Suspected Diagnosis | Other diagnostic tests           | Definite Diagnosis                                                    | Screening Method                                  | Affected Gen | Pathogenic or most probably potentially pathogenic variants found    | Genomic Position (hg19) | ACMG codes                                 | ACMG classification |
| P15                                                                                                                           | Myo058   | LGMDR-3-6           | Bx, MRI, lab, EcoK, Sp. EMG      | Unknown                                                               | DLE-NGS; CL-NGS; MyoPanel2, CNMDP <sup>(4a)</sup> | None         |                                                                      |                         |                                            |                     |
| P16                                                                                                                           | Myo064   | LGMD-R?             | Bx, MRI, lab, EcoK, Sp. EMG, Ab  | IMNM Anti HMGCR-Ab                                                    | DLE-NGS; CL-NGS; MyoPanel2                        | None         |                                                                      |                         |                                            |                     |
| P17                                                                                                                           | Myo067   | LGMD-R3-6           | Bx, MRI, lab, EcoK, Sp. EMG      | LGMD R5 $\gamma$ -Sarcoglycan related myopathy. SGCG absent in biopsy | DLE-NGS, CL-NGS, MyoPanel2, CNMDP                 | SGCG         | Deletion entire code sequence                                        |                         | PSV1_strong, PM4, PP4_mod                  | Pathogenic          |
| P18                                                                                                                           | Myo068   | LGMW                | Bx, MRI, lab, EcoK, Sp. EMG      | LGMD R1-Calpain 3 related myopathy                                    | DLE-NGS; MyoPanel2                                | CAPN3        | Ex10: NM_000070.3: c.1333G>C; p.(Gly445Arg); HEZ                     | 15:42691829             | PM3_strong, PS3, PM1, PM2, PP3             | Pathogenic          |
|                                                                                                                               |          |                     |                                  |                                                                       |                                                   |              | Ex22: NM_000070.3: c.2362_2363delinsTCATCT; p.(Arg788SerfsTer14) HEZ | 15:42703180-42703181    | PVS1, PM3_very_strong, PM2                 | Pathogenic          |
| P19                                                                                                                           | Myo074   | Dysferlinop.        | Bx, MRI, lab, EcoK, Sp. EMG      | LGMDR2-Dysferlin related myopathy                                     | NGS-DLE                                           | DYSF         | Ex27: NM_003494.4:c.2858dupT; p.(Phe954ValfsTer2) HOZ                | 2:71796997              | PVS1, PM2, PM3, PM4, PP4_mod               | Pathogenic          |
| P20                                                                                                                           | Myo075   | hiCK, myalgia       | Bx, MRI, lab, EcoK, Sp. EMG, Ab. | Fulfil diagnostic criteria for ALS                                    | DLE-NGS, CL-NGS, CNMDP                            | None         |                                                                      |                         |                                            |                     |
| P21                                                                                                                           | Myo078   | Dysferlinop.        | Bx, MRI, lab, EcoK, Sp. EMG, Ab. | LGMD R2-Dysferlin related myopathy                                    | NGS-DLE                                           | DYSF         | Ex27: NM_003494.4:c.2858dupT; p.(Phe954ValfsTer2) HOZ                | 2:71796997              | PVS1, PM2, PM3, PM4, PP4_mod               | Pathogenic          |
| P22                                                                                                                           | Myo079   | Dysferlinop.        | Bx, MRI, lab, EcoK, Sp. EMG, Ab. | LGMD R2-Dysferlin related myopathy                                    | NGS-DLE                                           | DYSF         | Ex13: NM_003494.4: c.1276G>A; p.(Gly426Arg) HEZ                      | 2:71755523              | PM3_strong, PM2, PP3, PP4_mod              | Likely pathogenic   |
|                                                                                                                               |          |                     |                                  |                                                                       |                                                   |              | Int44: NM_003494.4: c.4887-2A>G HEZ                                  | 2:71891396              | PSV1, PP4_mod, PM2, PM3_strong             | Pathogenic          |
| P23                                                                                                                           | Myo080   | Dysferlinop.        | Bx, MRI, lab, EcoK, Sp. EMG, Ab. | LGMD R2-Dysferlin related myopathy                                    | NGS-DLE                                           | DYSF         | Ex27: NM_003494.4:c.2858dupT; p.(Phe954ValfsTer2) HEZ                | 2:71796997              | PVS1, PM2, PM3, PM4, PP4_mod               | Pathogenic          |
|                                                                                                                               |          |                     |                                  |                                                                       |                                                   |              | Ex34: NM_003494.4:c.3770G>A; p.(Trp1257Ter) HEZ                      | 2:71827899              | PSV1, PP4_mod, PM2, PM3                    | Pathogenic          |
| P24                                                                                                                           | Myo084   | LGMD-R?             | Bx, MRI, lab, EcoK, Sp. EMG, Ab  | Unknown                                                               | DLE-NGS, CL-NGS, CNMDP                            | Nonet        |                                                                      |                         |                                            |                     |
| P25                                                                                                                           | Myo086   | LGMD-R1             | Bx, MRI, lab, EcoK, Sp. EMG, Ab  | Dystrophinopathy (BMD)                                                | DLE-NGS, CNMDP                                    | DMD          | Ex2: NM_004006.2:c.40_41del; p.(Glu14ArgfsTer17) HMZ                 | X:33038308-33038309     | PSV1, PM2, PM4, PP4_mod, PP5               | Pathogenic          |
| P26                                                                                                                           | Myo088   | LGMD-R2             | Bx, MRI, lab, EcoK, Sp. EMG      | LGMD R2-Dysferlin related myopathy                                    | NGS-DLE                                           | DYSF         | Int44: NM_003494.4:c.4887-2A>G HEZ                                   | 2:71891396              | PSV1, PP4_mod, PM2, PM3_strong             | Pathogenic          |
|                                                                                                                               |          |                     |                                  |                                                                       |                                                   |              | Ex26: NM_003494.4:c.2779delG; p.(Ala927LeufsTer21) HEZ               | 2:71795437              | PVS1, , PP1 supp; PM3 strong, PM2, PP4_mod | Pathogenic          |
| P27                                                                                                                           | Myo089   | LGMW-CMS            | Bx, MRI, lab, EcoK, Sp. EMG      | LEMS. P/Q-Type Calcium Channel Ab                                     | DLE-NGS, CNMDP                                    | TTN          | Ex343: NM_001267550.1: c.95195C>T; p.(Pro31732Leu) HEZ               | 2:179410768             | PM2, PP3, PM1, PS4, PS3                    | Pathogenic          |
|                                                                                                                               |          |                     |                                  |                                                                       |                                                   | CACNA1S      | Ex.13: NM_000069.2:c.1847G>A; p.(Trp616Ter) HEZ                      | 1:201044724             | PVS1, PM2, PS4_sup                         | Pathogenic          |

| Supplementary Table S1. Summary of the clinical and genetic screening of the Chilean series of patients with LGMW (Continued) |          |                     |                                  |                                                                 |                        |              |                                                                                          |                         |                                               |                     |
|-------------------------------------------------------------------------------------------------------------------------------|----------|---------------------|----------------------------------|-----------------------------------------------------------------|------------------------|--------------|------------------------------------------------------------------------------------------|-------------------------|-----------------------------------------------|---------------------|
| ID                                                                                                                            | Local ID | Suspected Diagnosis | Other diagnostic tests           | Definite Diagnosis                                              | Screening Method       | Affected Gen | Pathogenic or most probably potentially pathogenic variants found                        | Genomic Position (hg19) | ACMG codes                                    | ACMG classification |
| P28                                                                                                                           | Myo090   | LGMW                | Bx, MRI, lab, EcoK, Sp. EMG, Ab  | VCP-related myopathy                                            | DLE-NGS, CL-NGS, CNMDP | VCP          | Ex.6: NM_007126.3:c.648A>G; p.(Ile216Met) HEZ                                            | 9:35064211              | PM2, PP3, PP4_mod.                            | VUS                 |
| P29                                                                                                                           | Myo091   | Dysferlinop.        | Bx, MRI, lab, EcoK, Sp. EMG      | LGMDR2-Dysferlin related myopathy                               | NGS-DLE                | DYSF         | Int44: NM_003494.4:c.4887-2A>G HEZ                                                       | 2:71891396              | PSV1, PP4_mod, PM2, PM3_strong                | Pathogenic          |
|                                                                                                                               |          |                     |                                  |                                                                 |                        |              | Ex26: NM_003494.4:c.2779delG; p.(Ala927LeufsTer21) HEZ                                   | 2:71795437              | PVS1, , PP1 supp; PM3 strong, PM2, PP4_mod    | Pathogenic          |
| P30                                                                                                                           | Myo092   | LGMD?               | Bx, MRI, lab, EcoK, Sp. EMG      | RYR1-related myopathy                                           | DLE-NGS, CNMDP         | RYR1         | Ex31: NM_000540.2: c.4455_4459dup; p.(Lys1487TfsTer16) HEZ                               | 19:38969075_38969079    | PVS1, PM2, PS2??, PM3_sup, PP4_mod            | Pathogenic          |
|                                                                                                                               |          |                     |                                  |                                                                 |                        |              | Ex39: NM_000540.2:c.6502G>A; p.(Val2168Met) HEZ                                          | 19:38985219             | PM1, PM2, PP3, PP4, PM3_strong                | Pathogenic          |
| P31                                                                                                                           | Myo093   | LGMD?               | Bx, MRI, lab, EcoK, Sp. EMG      | Unknown                                                         | CL-NGS                 | None         |                                                                                          |                         |                                               |                     |
| P32                                                                                                                           | Myo094   | Dysferlinop.        | Bx, MRI, lab, EcoK, Sp. EMG      | LGMDR2-Dysferlin related myopathy. DYSF absent in muscle biopsy | NGS-DLE                | DYSF         | 5'UTR: NM_003494.3: c.-116delG HOZ                                                       | 2:71681013              | PM2, PP4_mod                                  | VUS                 |
| P33                                                                                                                           | Myo095   | hiCK, myalgia       | Bx, lab, EcoK, Sp. EMG           | Unknown. Normal dysferlin expression                            | NGS-DLE                | DYSF         | Ex53: NM_003494.3: c.5979dupA, p.(Glu1994ArgfsTer3) HEZ                                  | 2:71908163              | PVS1, PM3 very strong, PM2, PP4_mod, PP1_sup. | Pathogenic          |
| P34                                                                                                                           | Myo096   | LGMD, dyspnea       | Bx, MRI, lab, EcoK, Sp. EMG, DBS | LO Pompe Disease (former LGMD2V)                                | NGS-DLE                | GAA          | Int1: NM_000152.4: c.-32-13T>G HEZ                                                       | 17:78078341             | PVS1_strong, PM3_strong, PP4_mod, BS1         | Pathogenic          |
|                                                                                                                               |          |                     |                                  |                                                                 |                        |              | Ex18:NM_000152.4:c.2560C>T; p.(Arg854Ter) HEZ                                            | 17:78092070             | PVS1, PM2, PM3                                | Pathogenic          |
| P35                                                                                                                           | Myo097   | EDMD                | Bx, MRI, lab, EcoK, Sp. EMG      | Laminopathy A/C (former LGMD1B)                                 | CNMDP                  | LMNA         | Ex7: NM_170707.3:c.1357C>T; p.(Arg453Trp) HEZ                                            | 1:156106204             | PS3, PS4_Mod, PM1, PM2, PP4_mod, PP3          | Pathogenic          |
| P36                                                                                                                           | Myo099   | hiCK, myalgia       | Bx, MRI, lab, EcoK, Sp. EMG      | McArdle's disease                                               | CNMDP                  | PYGM         | Ex1: NM_005609.2:c.148C>T, p.(Arg50Ter) HEZ                                              | 11:64527223             | PVS1, PS3, PM3, PP1                           | Pathogenic          |
|                                                                                                                               |          |                     |                                  |                                                                 |                        |              | Del Ex.15-16 HEZ: NM_005609.2: c.(1768+1_1769-1)(1969+1_1970-1)del: p.(Arg590_Val657del) |                         | PVS1_Strong, PP4_mod                          | Likely Pathogenic   |
| P37                                                                                                                           | Myo100   | LGMD-R1             | Bx, MRI, lab, EcoK, Sp. EMG, SEG | LGMDR1-Calpain 3 related myopathy                               | CL-NGS                 | CAPN3        | Ex1: NM_000070.3:c.107delG: p.(Gly35fsTer21) HEZ                                         | 15:42652105             | PVS1, PM2, PM3, PP4_mod                       | Pathogenic          |
|                                                                                                                               |          |                     |                                  |                                                                 |                        |              | Ex22: NM_000070.3:c.2362_2363delinsTCATCT; p.(Arg788SerfsTer14) HEZ                      | 15:42703180-42703181    | PVS1, PM3_very_strong, PM2, PP4_mod           | Pathogenic          |
| P38                                                                                                                           | Myo101   | hiCK, myalgia       | Bx, MRI, lab, EcoK, Sp. EMG      | Congenital Paramyotonia                                         | CNMDP                  | SCN4A        | Ex13: NM_000334.4:c.2078T>C, ; p.(Ile693Thr) HEZ                                         | 17:62034820             | PS3, PS4_Mod, PM2, PP1, PP3, PP4_mod          | Pathogenic          |
| P39                                                                                                                           | Myo102   | Dysferlinop.        | Bx, lab, EMG                     | LGMDR2-Dysferlin related myopathy                               | DLE-NGS                | DYSF         | Ex27: NM_003494.4:c.2858dup; p.(Phe954ValfsTer2) HEZ                                     | 2:71796997              | PVS1, PM2, PM3, PM4, PP4_mod                  | Pathogenic          |
|                                                                                                                               |          |                     |                                  |                                                                 |                        |              | Ex53: NM_003494.3: c.5979dup; p.(Glu1994ArgfsTer3) HEZ                                   | 2:71908163              | PVS1, PM3_strong, PM2, PP4_mod, PP1_supp      | Pathogenic          |
| P40                                                                                                                           | Myo103   | hiCK, myalgia       | Bx, lab, EMG                     | Unknown                                                         | NGS-DLE                | None         |                                                                                          |                         |                                               |                     |

| Supplementary Table S1. Summary of the clinical and genetic screening of the Chilean series of patients with LGMW (Continued) |          |                     |                                  |                                                           |                       |               |                                                                     |                         |                                     |                     |
|-------------------------------------------------------------------------------------------------------------------------------|----------|---------------------|----------------------------------|-----------------------------------------------------------|-----------------------|---------------|---------------------------------------------------------------------|-------------------------|-------------------------------------|---------------------|
| ID                                                                                                                            | Local ID | Suspected Diagnosis | Other diagnostic tests           | Definite Diagnosis                                        | Screening Method      | Affected Gen  | Pathogenic or most probably potentially pathogenic variants found   | Genomic Position (hg19) | ACMG codes                          | ACMG classification |
| P41                                                                                                                           | Myo103.1 | hiCK, myalgia       | Bx, lab, EMG                     | Unknown                                                   | NGS-DLE               | <i>None</i>   |                                                                     |                         |                                     |                     |
| P42                                                                                                                           | Myo104   | LGMDR, myositis     | Bx, lab, EMG                     | Dysferlinopathy?                                          | NGS-DLE               | <i>DYSF</i>   | Ex14: NM_003494.3:c.1186G>A, p.(Asp396Ala) HOZ                      | 2:71755433              | PM1, PM2, PP3                       | VUS                 |
| P43                                                                                                                           | Myo105   | LGMD-R?             | Bx, lab, EMG                     | Unknown                                                   | NGS-DLE               | <i>None</i>   |                                                                     |                         |                                     |                     |
| P44                                                                                                                           | Myo106   | LGMD-R?             | Bx, lab, EcoK, Sp. EMG           | Dystrophinopathy? DYS reduced in muscle biopsy            | DLE-NGS, CNMDP        | <i>None</i>   |                                                                     |                         |                                     |                     |
| P45                                                                                                                           | Myo107   | LGMD-R?             | Bx, lab, EcoK, Sp. EMG           | LGMDR4 $\beta$ -Sarcoglycan related myopathy              | DLE-NGS               | <i>SGCB</i>   | Int4: NM_000232.4:c.621+1G>A HOZ                                    | 4:52894895              | PVS1, PM2, PP4_mod                  | Pathogenic          |
| P46                                                                                                                           | Myo109   | LGMD-R?             | Bx, MRI, lab, EcoK, Sp. EMG      | LGMDR1-Calpain 3 related myopathy                         | CL-NGS                | <i>CAPN3</i>  | Ex19: NM_000070.2:c.2105C>T; p.(Ala702Val) HEZ                      | 15:42702183             | PM2, PP3, PP4_mod, PM3_very_strong  | Pathogenic          |
|                                                                                                                               |          |                     |                                  |                                                           |                       |               | Ex22: NM_000070.3:c.2362_2363delinsTCATCT; p.(Arg788SerfsTer14) HEZ | 15:42703180-42703181    | PVS1, PM3_very_strong, PM2, PP4_mod | Pathogenic          |
| P47                                                                                                                           | Myo111   | LGMW                | Bx, MRI, lab, EcoK, Sp. EMG, SEG | <i>MTM1</i> -Related Congenital Myopathy                  | CNMDP                 | <i>MTM1</i>   | Int11: NM_000252.2:c.1261-10A>G; HEZ                                | X:149828127             | PP3, PM2, PS4, PP4_mod              | Pathogenic          |
| P48                                                                                                                           | Myo115   | LGMD, myalgia       | Bx, MRI, lab, EcoK, Sp. EMG, Ab. | Unknown                                                   | CL-NGS, CNMDP         | <i>None</i>   |                                                                     |                         |                                     |                     |
| P49                                                                                                                           | Myo116   | LGMD, myalgia       | Bx, MRI, lab, EcoK, Sp. EMG      | LGMDR12-Anoctamin 5 related myopathy                      | CL-NGS                | <i>ANOS</i>   | Ex19: NM_213599.3:c.2201T>C; p.(Leu734Pro) HOZ                      | 11:22294501             | PM2, PM3_sup, PP3, PP4_mod??        | Likely pathogenic   |
|                                                                                                                               |          |                     |                                  |                                                           |                       |               | Ex5: NM_213599.3:c.191dupA; p.(Asn64LysfsTer15) HEZ                 | 11:22242646             | PM2, PM3, PP3, PP4_mod??            | Likely Pathogenic   |
| P50                                                                                                                           | Myo117   | LGMD                | Bx, MRI, lab, EcoK, Sp. EMG, Ab. | IMNM Anti-HMGCR                                           | DLE-NGS, CNMDP        | <i>None</i>   |                                                                     |                         |                                     |                     |
| P51                                                                                                                           | Myo118   | Emery Dreifuss      | Bx, lab,                         | XL-Emery Dreyfus muscular dystrophy                       | NGS-DLE, CNMDP        | <i>EMD</i>    | Ex6: NM_000117.3:c.619del; p.(Arg207GlyfsTer30) HMZ                 | X:153609411             | PVS1_Strong, PS4_mod, PM2, PP4_mod  | Pathogenic          |
| P52                                                                                                                           | Myo119   | LGMW                | Bx, MRI, lab, EcoK, Sp. EMG      | Unknown                                                   | CNMDP                 | <i>None</i>   |                                                                     |                         |                                     |                     |
| P53                                                                                                                           | Myo120   | LGMW                | Bx, lab, EcoK, Sp. EMG           | Dystrophinopathy? Reduced DYS expression in muscle biopsy | CNMDP <sup>(4b)</sup> | <i>None</i>   |                                                                     |                         |                                     |                     |
| P54                                                                                                                           | Myo121   | LGMW                | Bx, MRI, lab, EcoK, Sp. EMG,     | LGMDR3 $\alpha$ -Sarcoglycan related myopathy             | CL-NGS                | <i>SGCA</i>   | Ex3: NM_000023.3:c.229C>T, p.(Arg77Cys) HEZ                         | 17:48245014             | PP3, PP4_mod, PM3_very strong       | Pathogenic          |
|                                                                                                                               |          |                     |                                  |                                                           |                       |               | Ex6: NM_000023.3:c.746T>C, p.(Leu249Pro) HEZ                        | 17:48246614             | PM2, PP3, PP4_mod, PM3, PP1_strong  | Pathogenic          |
| P55                                                                                                                           | Myo126   | LGMW, dyspnea       | Bx, Lab, EMG, EcoK, Sp.          | Unknown                                                   | NGS-DLE, CNMDP        | <i>None</i>   |                                                                     |                         |                                     |                     |
| P56                                                                                                                           | Myo128   | LGMD-R1             | Bx, MRI, lab, EcoK, Sp. EMG      | LGMDR22-COL6A3 related myopathy                           | CL-NGS, CNMDP         | <i>COL6A3</i> | Ex10: NM_004369.4:c.4899del, p.(Glu1634ArgfsTer32) HOZ              | 2:237368564             | PVS1, PM2, PM3_sup, PP4_mod         | Pathogenic          |

| Supplementary Table S1. Summary of the clinical and genetic screening of the Chilean series of patients with LGMW (Continued) |            |                     |                             |                                                                 |                             |               |                                                                                               |                         |                                          |                     |
|-------------------------------------------------------------------------------------------------------------------------------|------------|---------------------|-----------------------------|-----------------------------------------------------------------|-----------------------------|---------------|-----------------------------------------------------------------------------------------------|-------------------------|------------------------------------------|---------------------|
| ID                                                                                                                            | Local ID   | Suspected Diagnosis | Other diagnostic tests      | Definite Diagnosis                                              | Screening Method            | Affected Gen  | Pathogenic or most probably potentially pathogenic variants found                             | Genomic Position (hg19) | ACMG codes                               | ACMG classification |
| P57                                                                                                                           | Myo131     | LGMW                | Bx, MRI, lab, EcoK, Sp. EMG | LGMDR10-Titin related myopathy?                                 | CNMDP                       | <i>TTN</i>    | Ex326:NM_001267550:c.70897dup; p.(Leu23633ProfsTer17) HEZ                                     | 2:179439962             | PVS1, PM2, PS4_sup                       | Pathogenic          |
| P58                                                                                                                           | Myo132     | LGMW                | Bx, MRI, lab, EcoK, Sp. EMG | Dystrophinopathy (BMD)                                          | CNMDP                       | <i>DMD</i>    | Ex2: NM_004006.2:c.40_41del; p.(Glu14ArgfsTer17) HMZ                                          | X:33038308-33038309     | PSV1, PS4_sup, PM2                       | Pathogenic          |
| P59                                                                                                                           | Myo137     | Dysferlinop.        | Bx, MRI, lab, EcoK, Sp. EMG | LGMDR2-Dysferlin related myopathy                               | CL-NGS                      | <i>DYSF</i>   | Ex42: NM_003494.3:c.4491G>T, p.(Lys1497Asn) HEZ                                               | 2:71871175              | PM2, PP4_mod, PM3_sup                    | VUS                 |
|                                                                                                                               |            |                     |                             |                                                                 |                             |               | Ex53: NM_003494.3: c.5979dup, p.(Glu1994ArgfsTer3) HEZ                                        | 2:71908163              | PVS1, PM3_strong, PM2, PP4_mod, PP1_supp | Pathogenic          |
| P60                                                                                                                           | Myo139     | LGMW                | Bx, MRI, lab, EcoK, Sp. EMG | Dystrophinopathy (BMD)                                          | CNMDP                       | <i>DMD</i>    | Ex. 2-45: NM_004006.2: c.(31+1_32-1)(6614+1_6615-1)del ; p.(Tyr11CysfsTer2), out of frame HMZ |                         | PSV1, PM1, PP4                           | Pathogenic          |
| P61                                                                                                                           | Myo140     | Dysferlinop.        | Bx, MRI, lab, EcoK, Sp. EMG | LGMDR2-Dysferlin related myopathy. DYSF absent in muscle biopsy | CNMDP                       | <i>DYSF</i>   | Ex50: NM_003494.3:c.5594delG, p.(Gly1865AlafsTer101) HEZ                                      | 2:71896803              | PVS1, PM3_strong, PM2, PP4_mod, PP1_mod  | Pathogenic          |
| P62                                                                                                                           | Myo141     | LGMD-R1             | Bx, MRI, lab, EcoK, Sp. EMG | <i>RYR1</i> -related myopathy?                                  | CNMDP                       | <i>RYR1</i>   | Int14: NM_000540.2: c.1577-5C>G HEZ                                                           | 19:38946086             | PM2, PP3, PM6                            | VUS                 |
| P63                                                                                                                           | Myo142     | LGMW, distal        | Bx, MRI, lab, EcoK, Sp. EMG | <i>RYR1</i> -related myopathy                                   | CNMDP                       | <i>RYR1</i>   | Ex98: NM_000540.2: c.14209C>T; p.(Arg4737Trp) HEZ                                             | 19:39068594             | PS4_mod, PM1, PM2, PP3, PP1_mod          | Likely Pathogenic   |
| P64                                                                                                                           | Myo142.1   | LGMW, distal        | Lab, EMG                    | <i>RYR1</i> -related myopathy                                   | CNMDP                       | <i>RYR1</i>   | Ex98: NM_000540.2: c.14209C>T; p.(Arg4737Trp) HEZ                                             | 19:39068594             | PS4_mod, PM1, PM2, PP3, PP1_mod          | Likely pathogenic   |
| P65                                                                                                                           | Myo143     | LGMW                | Bx, MRI, lab, EcoK, Sp. EMG | <i>SYNE2</i> -related myopathy?                                 | CNMDP                       | <i>SYNE2</i>  | Ex34: NM_182914.2: c.4933C>G; p.(Leu1645Val), HEZ                                             | 14:64484358             | PM2, PP4                                 | VUS                 |
| P66                                                                                                                           | Myo144     | LGMD, dyspnea       | Bx, MRI, lab, EcoK, Sp. EMG | <i>TPM3</i> -related congenital myopathy. CFTD and Cap Disease  | CNMDP                       | <i>TPM3</i>   | Ex8: NM_152263.4:c.709G>A, p.(Glu237Lys) HTZ                                                  | 1:154142942             | PS4_sup, PM2, PP3, PP4_mod               | Likely Pathogenic   |
| P67                                                                                                                           | Myo145     | Dysferlinop.        | Lab, EcoK, Sp. EMG          | LGMDR2-Dysferlin related myopathy                               | CNMDP                       | <i>DYSF</i>   | Ex53: NM_003494.3: c.5979dup; p.(Glu1994ArgfsTer3) HOZ                                        | 2:71908163              | PVS1, PM3_strong, PM2, PP4_mod, PP1_supp | Pathogenic          |
| P68                                                                                                                           | Myo146     | LGMD                | Lab, EcoK, Sp. EMG          | LGMD5-COL6A1-related myopathy                                   | CNMDP                       | <i>COL6A1</i> | Int14: NC_000021.9: c.1056+5G>A HEZ                                                           | 21:47410745             | PS2, PS4_mod, PM4, PM2, PP3, PP4         | Pathogenic          |
| P69                                                                                                                           | Dysf015 H1 | Dysferlinop.        | Bx, lab, EcoK, Sp.          | LGMDR2-Dysferlin related myopathy                               | NGS-DLE                     | <i>DYSF</i>   | Ex27: NM_003494.4:c.2858dup ; p.(Phe954ValfsTer2) HOZ                                         | 2:71796997              | PVS1, PM2, PM3, PM4, PP4                 | Pathogenic          |
| P70                                                                                                                           | Myo135     | LGMD-R1             | Bx, MRI, lab, EcoK, Sp. EMG | SMN1 / SMA3                                                     | CL-NGS, MLPA <sup>(5)</sup> | <i>SMN1</i>   | NM_000344.3: SMN1 0 copies                                                                    |                         | PVS1, PP4_mod                            | Pathogenic          |
| P71                                                                                                                           | Myo138     | LGMW                | MRI, lab, EcoK, Sp. EMG     | SMN1 / SMA3                                                     | CL-NGS, MLPA                | <i>SMN1</i>   | NM_000344.3:SMN1 0 copies; NM_017411.3:SMN2 3 copies                                          |                         | PVS1, PP4_mod                            | Pathogenic          |
| P72                                                                                                                           | Myo148     | LGMW, distal        | Bx, EMG                     | desmin-related myopathy (former LGMD1E)                         | CNMDP                       | <i>DES</i>    | Ex 6: NM_001927.4: c.1049G>C, p.(Arg350Pro) HEZ                                               | 2:220286087             | PS3, PS4_mod, PM2, PP3, PP4_mod          | Pathogenic          |

| Supplementary Table S1. Summary of the clinical and genetic screening of the Chilean series of patients with LGMW (Continued) |          |                     |                        |                                                                             |                  |              |                                                                                                     |                         |                                     |                     |
|-------------------------------------------------------------------------------------------------------------------------------|----------|---------------------|------------------------|-----------------------------------------------------------------------------|------------------|--------------|-----------------------------------------------------------------------------------------------------|-------------------------|-------------------------------------|---------------------|
| ID                                                                                                                            | Local ID | Suspected Diagnosis | Other diagnostic tests | Definite Diagnosis                                                          | Screening Method | Affected Gen | Pathogenic or most probably potentially pathogenic variants found                                   | Genomic Position (hg19) | ACMG codes                          | ACMG classification |
| P73                                                                                                                           | Myo149   | Dysferlinop.        | EMG                    | LGMDR2-Dysferlin related myopathy                                           | CNMDP            | DYSF         | Ex26: NM_003494.4:c.2779del ; p.(Ala927LeufsTer21) HEZ                                              | 2:71795437              | PVS1, PM3_strong, PM2, PP1, PP4_mod | Pathogenic          |
|                                                                                                                               |          |                     |                        |                                                                             |                  |              | Ex53: NM_003494.3: c.5979dupA; p.(Glu1994ArgfsTer3) HEZ                                             | 2:71908163              | PVS1, PM3_strong, PM2, PP4_mod, PP1 | Pathogenic          |
|                                                                                                                               |          |                     |                        |                                                                             |                  | GFPT1        | Int8: NM_001244710.1: c.686-2A>G HEZ                                                                | 2:69581446              | PSV1, PS4_mod, PM2                  | Pathogenic          |
| P74                                                                                                                           | Myo150   | Dysferlinop.        | EMG                    | LGMDR2-Dysferlin related myopathy                                           | CNMDP            | DYSF         | Ex53: NM_003494.3: c.5979dup ; p.(Glu1994ArgfsTer3) HOZ                                             | 2:71908163              | PVS1, PM2, PM3_strong, PP4_mod, PP1 | Pathogenic          |
| P75                                                                                                                           | Myo151   | LGMW                | Bx                     | Dystrophinopathy (BMD)                                                      | CNMDP            | DMD          | Ex.10-22: NM_004006.2:c.(960+1_961-1)(2949+1_2950-1)del; p.(His320_Ala983del) In frame deletion HMZ |                         | PSV1_strong, PM1, PM2, PP4_mod      | Pathogenic          |
| P76                                                                                                                           | Myo152   | LGMW                | Bx, MRI, Sp., EMG      | VCP-related myopathy                                                        | CNMDP            | VCP          | Ex5: NM_007126.3:c.463C>T ; p.(Arg155Cys) HEZ                                                       | 9:35065361              | PM1, PM2, PM5, PP3, PP4_mod         | Likely Pathogenic   |
| P77                                                                                                                           | Myo153   | LGMW, hICK          | Bx, EMG                | McArdle's disease                                                           | CNMDP            | PYGM         | Ex1 : NM_005609.2 : c.148C>T ; p.(Arg50Ter) HOZ                                                     | 11:64527223             | PVS1, PS3, PM3_strong, PP4, BS1     | Pathogenic          |
| P78                                                                                                                           | Myo154   | LGMW, dyspnea       | Bx, MRI, EMG, Sp. EcoK | LO-Pompe disease (Former LGMD2V)                                            | CNMDP            | GAA          | Int12: NM_000152.4: c.1755-1G>A HEZ                                                                 | 17:78086376             | PVS1, PM2, PM3, PP4                 | Pathogenic          |
|                                                                                                                               |          |                     |                        |                                                                             |                  |              | Ex11: NM_000152.4:c.1559A>G; p.(Asn520Ser) HEZ                                                      | 17:78084747             | PM1, PM2, PP3, PP4_mod              | Likely Pathogenic   |
| P79                                                                                                                           | Myo155   | Dysferlinop.        | EMG                    | LGMDR2-Dysferlin related myopathy                                           | CNMDP            | DYSF         | Ex26: NM_003494.4:c.2779del; p.(Ala927LeufsTer21) HEZ                                               | 2:71795437              | PVS1, PM2, PM3_strong, PP1, PP4_mod | Pathogenic          |
|                                                                                                                               |          |                     |                        |                                                                             |                  |              | Ex53: NM_003494.3: c.5979dup ; p.(Glu1994ArgfsTer3) HEZ                                             | 2:71908163              | PVS1, PM2, PM3_strong, PP1, PP4_mod | Pathogenic          |
|                                                                                                                               |          |                     |                        |                                                                             |                  | GFPT1        | Int8: NM_001244710.1: c.686-2A>G HEZ                                                                | 2:69581446              | PSV1, PS4_mod, PM2                  | Pathogenic          |
| P80                                                                                                                           | Myo156   | Dysferlinop.        | EMG                    | LGMDR2-Dysferlin related myopathy                                           | CNMDP            | DYSF         | Ex26: NM_003494.3:c.2779del; p.(Ala927LeufsTer21) HEZ                                               | 2:71795437              | PVS1, PM2, PM3_strong, PP1, PP4_mod | Pathogenic          |
|                                                                                                                               |          |                     |                        |                                                                             |                  |              | Ex40: NM_003494.3:c.4390G>T, p.(Glu1464Ter) HEZ                                                     | 2:71840520              | PVS1, PM2, PM3, PP4_mod             | Pathogenic          |
| P81                                                                                                                           | Myo157   | LGMW                | MRI, Bx,               | LGMDR5 $\gamma$ -Sarcoglycan related myopathy. SGCG absent in muscle biopsy | CNMDP            | SGCG         | Ex8: NM_000231.2:c.817T>A p.(Tyr273Asn) HTZ                                                         | 13:23898621             | PM2, PP3, PP4_mod                   | VUS                 |
| P82                                                                                                                           | Myo158   | Dysferlinop.        | EMG, Bx                | LGMDR2-dysferlin related myopathy. DYSF absent in muscle biopsy             | CNMDP            | DYSF         | Ex27: NM_003494.4:c.2858dup; p.(Phe954ValfsTer2) HEZ                                                | 2:71796997              | PVS1, PM2, PM3, PP4_mod             | Pathogenic          |

**Supplementary Table S1 References:** hi-CK, hyperckemia; LGMD, limb girdle muscular dystrophy; LGMDW, limb girdle muscular weakness; CMS, congenital myasthenic syndrome; EDMD, Emery Dreifuss Muscular Dystrophy phenotype, Bx, muscle biopsy; MRI, muscle MR imaging; Lab: CK levels; EMG, electrophysiology; EcoK; Echocardiogram; Sp, Spirometry; SEG, segregation study completed by Sanger; Ab, serology for anti-myositis specific, associated antibodies and anti-HMGCR antibodies. IMNM, immune mediated necrotizing myopathy; DBS, dry blood spot test for Pompe's disease; HOZ, homozygous; HEZ, heterozygous; HMZ, hemizygous. All mutations were confirmed by Sanger. NGS methods used **(1) MyoPanel2**, 306 genes panel (Marseille, France); **(2) DLE-NGS (Sanofi-Genzyme)**, 10 genes panel, 9 most frequent recessive LGMD and Pompe disease (DLE Labs, Sao Paulo, Brazil); **(3) CL-NGS**, locally designed 15 LGMD-genes panel; **(4a) CNMDP-Invitae™**. 123-gene comprehensive neuromuscular disorders panel or **(4b)** 137-gene comprehensive neuromuscular disorders panel was used only in case P53-Myo120 (California, USA). **(6)** MLPA for SMN1 and SMN2 in P70-Myo135 and P71-Myo138 (See Supplementary File 1)
